# Supplementary material for: Evolution of cytokine production capacity in ancient and modern European populations
Source: eLife. 2021 Sep 7;10:e64971. doi: 10.7554/eLife.64971 (PMC8423439; doi:10.7554/eLife.64971)
Supplement: Supplementary file 1. — (a) Overview of the stimulus, cytokine, and time-point combinations. In total, 105 unique stimulated cytokine traits were available using various types of stimuli measuring both the innate and the adaptive immune response. (b) Tests for selection as opposed to the genetic drift were performed between populations from adjacent time periods. A two-tailed test was used to determine whether the mean trait Fst between pre-Neolithic–Neolithic, Neolithic–post-Neolithic, and post-Neolithic–Modern samples was significantly different compared to 10,000 random LD- and MAF-matched mean Fsts calculated using the same amount of single-nucleotide polymorphisms (SNPs). [file elife-64971-supp1.xlsx]

## Sheet: 1A
	PBMC	Macrophage	WB	PBMC
	24h	24h	48h	7d
A.fumigatusconidia				IFNy, IL22
B.burgdorferi	IL1b, IL6			IFNy, IL22,
B.fragilis	IL1b, IL6
Bacteroides				IFNy, IL17, IL22
Borreliamix	IL1b, IL6			IFNy, IL22
C.albicans.yeast	IL1Ra, IL8, IL10
C.albicansconidia	IL1b, IL6, TNFa	IL6, TNFa		IFNy, IL17, IL22
C.albicanshyphae	IL1b, IL6, TNFa			IFNy, IL17, IL22
C.burnetiininemileSerum	IL1b, IL6, TNFa
C.conidiaHK			IFNy, IL1b, IL6, TNFa
CpG	IL6
Cryptococcus	IL1b, IL6, TNFa			IFNy, IL17, IL22
E.Coli	IL1b, IL6, TNFa
A.fumigatusconidia Serum	IL6, TNFa
Influenza	IL1b, IL6, TNFa
LPS		IL6, TNFa	IFNy, IL1b, IL6, TNFa
LPS 100ng	IL1b, IL1Ra, IL6, IL8, IL10, TNFa
LPS 1ng	IL1b, IL1Ra, IL6, IL8
MSUC16	IL1b, IL6, TNFa
MTB	IL1b, IL6,	IL6, TNFa		IFNy, IL17, IL22
Pam3Cys	IL1Ra, IL6, IL8, IL10, TNFa
PHA			IFNy, IL1b, IL6, TNFa
Poly IC	IL1b, IL6
S.aureus	IL1b, IL1Ra, IL6, IL8, IL10, TNFa		IFNy, IL1b, IL6, TNFa	IFNy, IL22
S.typhimurium		IL6, TNFa
Total N	58	8	16	23

## Sheet: 1B
		pre-Neolithic - Neolithic		Neolithic - post-Neolithic		post-Neolithic - Modern
Traits	N	FST	P	FST	P	FST	P
Ankylosing-Spondylitis	77	0.0611997785974026	78	0.0143163963116883	0.2064	0.0119201027805195	0.0036
Celiac-Disease	127	0.0445392010866142	1	0.0137866615897638	0.0972	0.0100963643393701	0.0036
Chronic-Viral-Hepatitis	25	0.02102894672	1	0.00162343352	1	0.00544545312	1
Crohns-Disease	304	0.0464090920361842	1	0.00956588586447369	1	0.00690142480065789	12
HIV-AIDS	29	0.00944679655172414	1	0.00657891200655172	1	0.00674081183986207	1
Inflammatory-Bowel-Disease	347	0.0500600973455331	0.5364	0.00977262369884726	1	0.00821916490259366	0.0012
Juvenile-Idiopathic-Arthritis	27	0.0368569544814815	1	0.0260329789259259	0.0216	0.0116956214162963	0.0828
Malaria	15	0.010141974	1	-0.00499140833333333	522	0.009345894	1
Multiple-Sclerosis	137	0.0420907678321168	1	0.0247559236934307	0.0012	0.00735703007226277	0.0852
Rheumathoid-Arthritis	181	0.0427263846077348	1	0.0103325295530939	1	0.00679843481055249	0.0804
Tuberculosis	9	0.00496408754555556	1	-0.00266240444444444	1	0.0103062566666667	906
Ulcerative-Colitis	231	0.0516962448701299	0.6336	0.00958553381168831	1	0.00770903933290043	0.0096
